# Supplementary material for: Montmorillonite-Based Natural Adsorbent from Colombia for the Removal of Organic Pollutants from Water: Isotherms, Kinetics, Nature of Pollutants, and Matrix Effects
Source: MDPI journal article supplement (doi:10.3390/w15061046), 2023-03-09
Supplement: s1 [file s1]

## Supplementary material

# Montmorillonite-Based Natural Adsorbent from Colombia for the Removal of Organic Pollutants from Water: Isotherms, Kinetics, Nature of Pollutants, and Matrix Effects

Marcela Paredes-Laverde <sup>1,2</sup>, Diego F. Montaña <sup>3</sup> and Ricardo A. Torres-Palma <sup>1,\*</sup>

<sup>1</sup> Grupo de Investigación en Remediación Ambiental y Biocatálisis (GIRAB), Instituto de Química, Facultad de Ciencias Exactas y Naturales, Universidad de Antioquia UdeA, Calle 70 No. 52-21, Medellín 50011, Colombia;

<sup>2</sup> Grupo de Investigación Cuidados de la Salud e Imágenes Diagnósticas, Facultad de Ciencias de la Salud, Fundación Universitaria Navarra—Uninavarra, Calle 10 No. 6-41, Neiva 31008, Colombia

<sup>3</sup> Grupo de Investigación Ciencia y Diseño de Materiales (CiDiMat), Departamento de Química, Facultad de Ciencias Básicas, Universidad de Pamplona, Km 1 Via Bucaramanga Ciudad Universitaria, Calle 5 No. 3-93, Pamplona 26909, Colombia;

\* Correspondence: ricardo.torres@udea.edu.co; Tel.: +57-315-314-98-76

**Table S1.** Chemical composition of fresh urine and textile wastewater.

| Fresh Urine                          |       | Textile wastewater                  |                        |
|--------------------------------------|-------|-------------------------------------|------------------------|
| Concentration [mg L <sup>-1</sup> ]  |       | Concentration [mg L <sup>-1</sup> ] |                        |
| Urea                                 | 16000 | Dye                                 | Required concentration |
| Na <sub>2</sub> SO <sub>4</sub>      | 2300  | NaCl                                | 1500                   |
| NH <sub>4</sub> Cl                   | 1800  | Na <sub>2</sub> CO <sub>3</sub>     | 500                    |
| NaH <sub>2</sub> PO <sub>4</sub>     | 2900  | NaHCO <sub>3</sub>                  | 500                    |
| KCl                                  | 4200  | NaOH                                | 500                    |
| MgCl <sub>2</sub> •6H <sub>2</sub> O | 790   | H <sub>2</sub> SO <sub>4</sub>      | 800                    |
| CaCl <sub>2</sub> •2H <sub>2</sub> O | 680   | Starch                              | 500                    |
| NaOH                                 | 120   |                                     |                        |

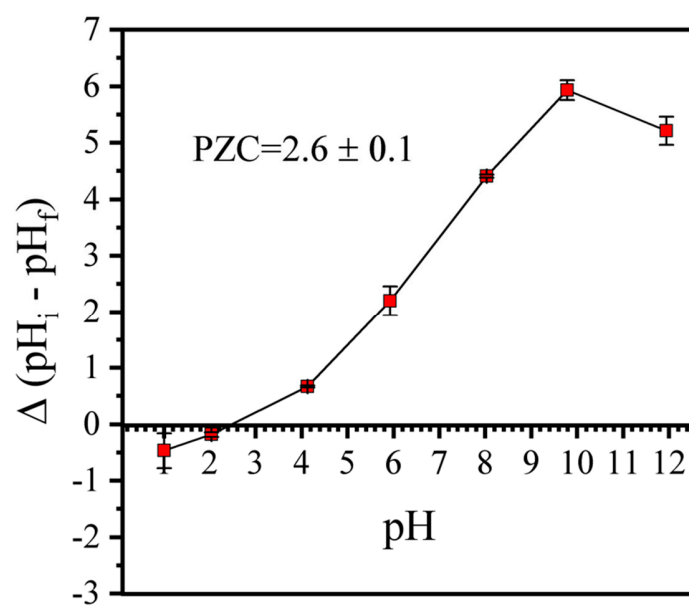

**Figure S1.** Determination of PZC value of MMT

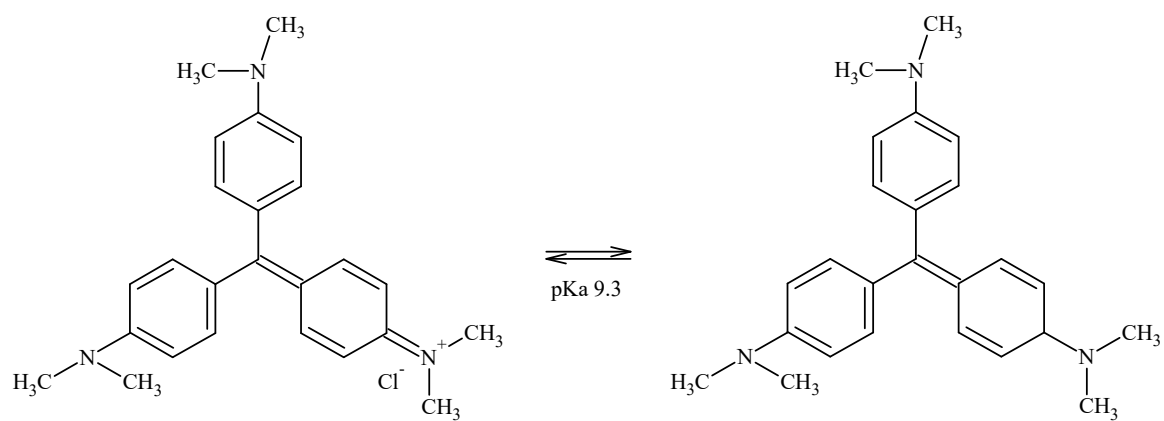

**Figure S2.** Structure CV

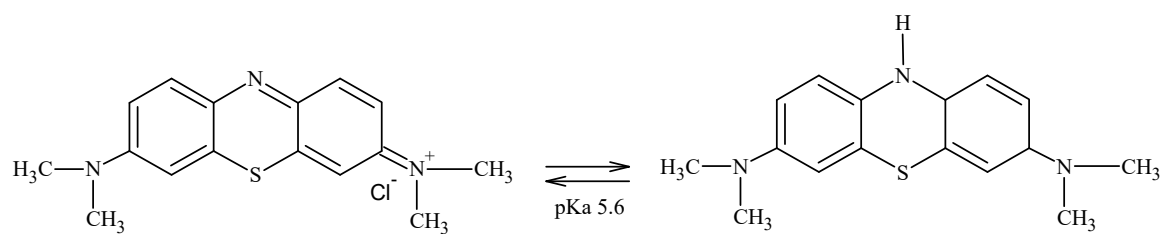

**Figure S3.** Structure MB

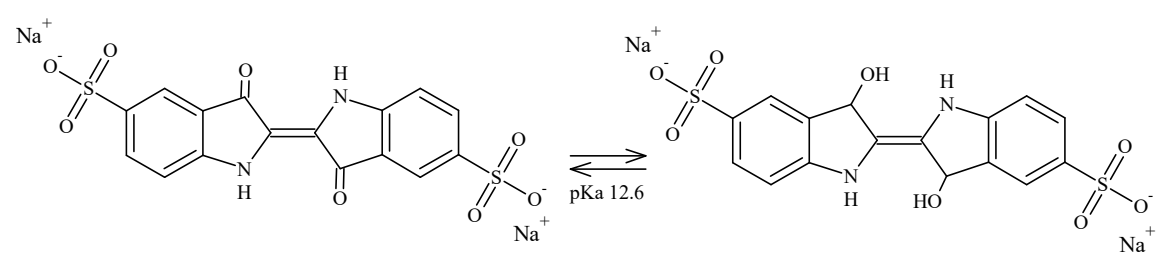

**Figure S4.** Structure IC

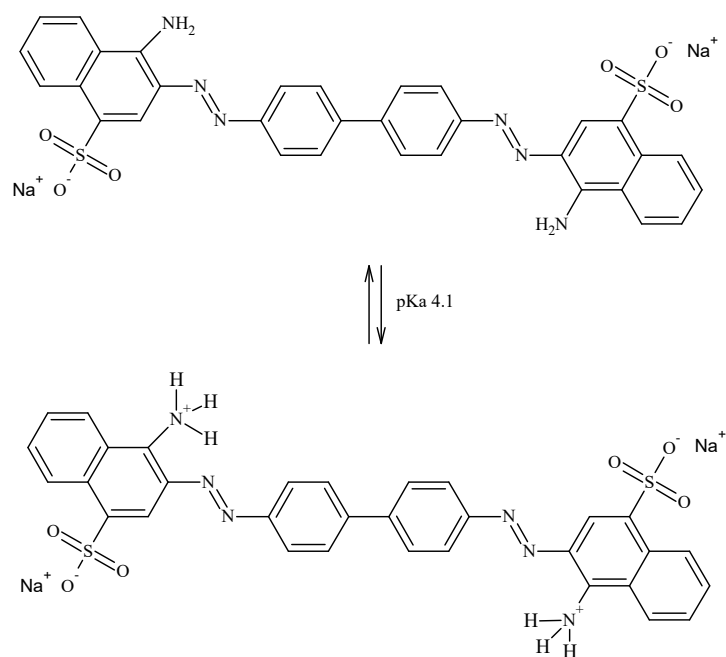

**Figure S5.** Structure CR

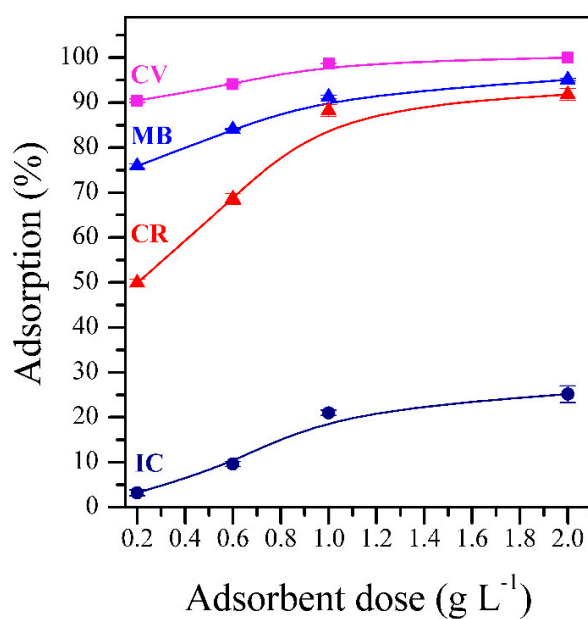

**Figure S6.** Effect of MMT dose in the adsorption percentage of CV, MB, CR and IC after 60 min. Conditions: Dyes concentration  $1.23 \times 10^{-2} \text{ mmol L}^{-1}$ , adsorbent dose  $0.2 - 2 \text{ g L}^{-1}$ , particle size  $<200 \text{ }\mu\text{m}$ , pH: IC: 5.7; CR: 6.5; MB: 5.6; CV: 7.3, temperature  $25^\circ\text{C}$ , stirring rate 200 rpm.

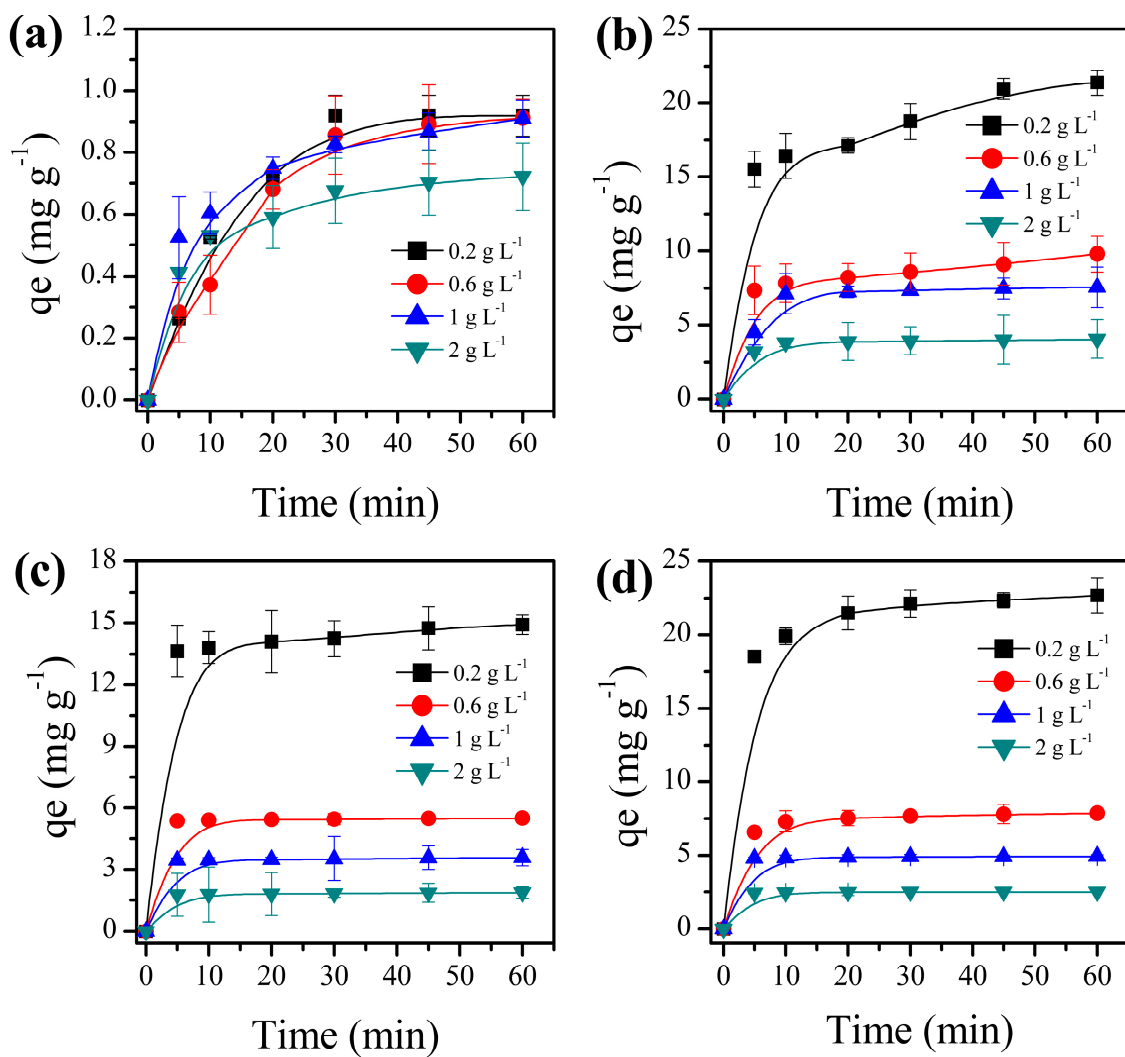

**Figure S7.** IC, CR, MB and CV removal in distilled water using different doses of MMT. Conditions: dyes concentration  $1.23 \times 10^{-2}$  mmol L<sup>-1</sup> (IC: 5.74 mg L<sup>-1</sup>, CR: 8.57 mg L<sup>-1</sup>, MB: 3.93 mg L<sup>-1</sup> and CV: 4.85 mg L<sup>-1</sup>), adsorbent dose 0.2 - 2 g L<sup>-1</sup>, particle size <200  $\mu$ m, pH: IC: 5.7; CR: 6.5; MB: 5.6; CV: 7.3, temperature 25°C, stirring rate 200 rpm.

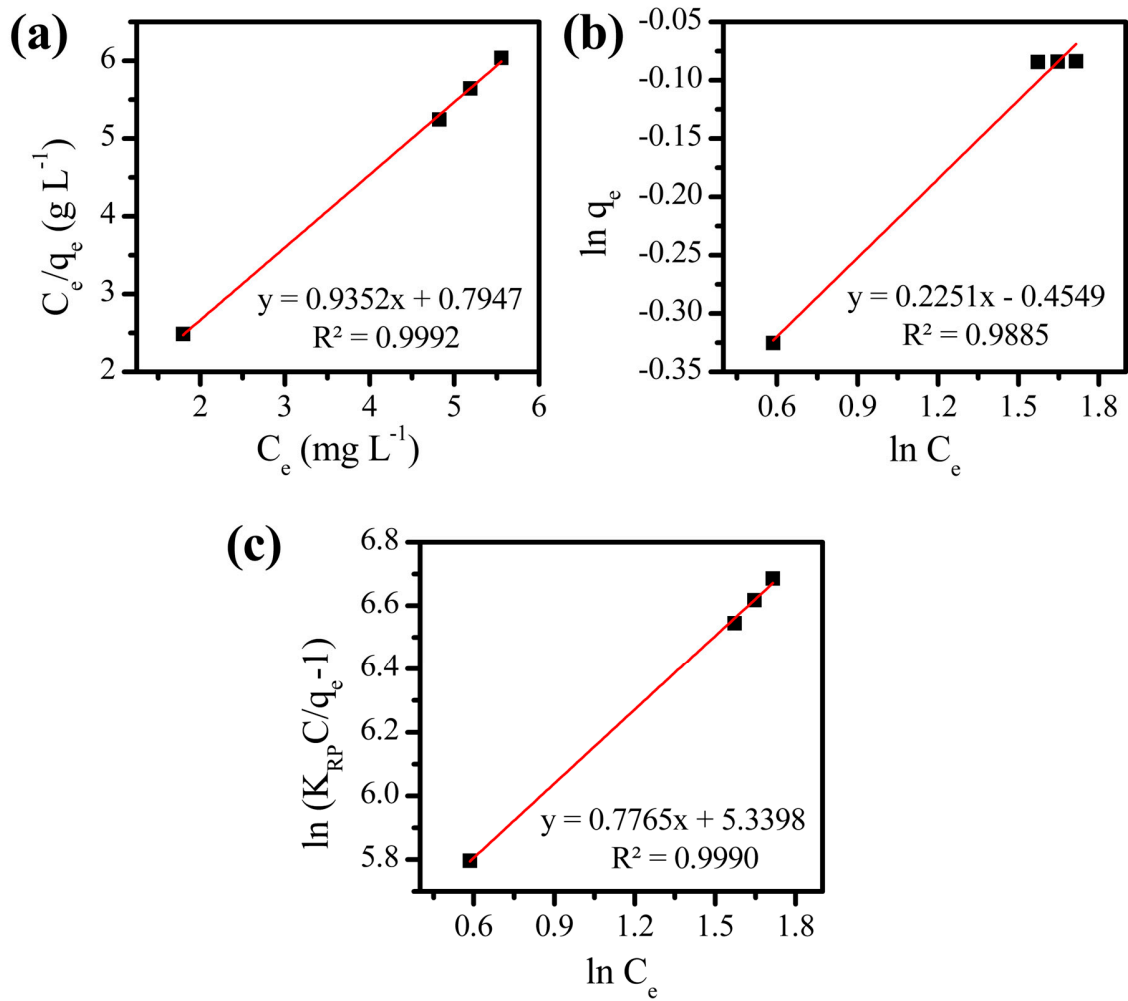

**Figure S8.** Adsorption isotherms for IC removal in distilled water using MMT as an adsorbent. (a) Langmuir model; (b) Freundlich model; (c) Redlich-Peterson model. Conditions: dye concentration  $1.23 \times 10^{-2}$  mmol L<sup>-1</sup> (5.74 mg L<sup>-1</sup>), adsorbent dose 0.2 - 2 g L<sup>-1</sup>, particle size <200  $\mu$ m, pH: 5.7, temperature 25°C, stirring rate 200 rpm, time 60 min.

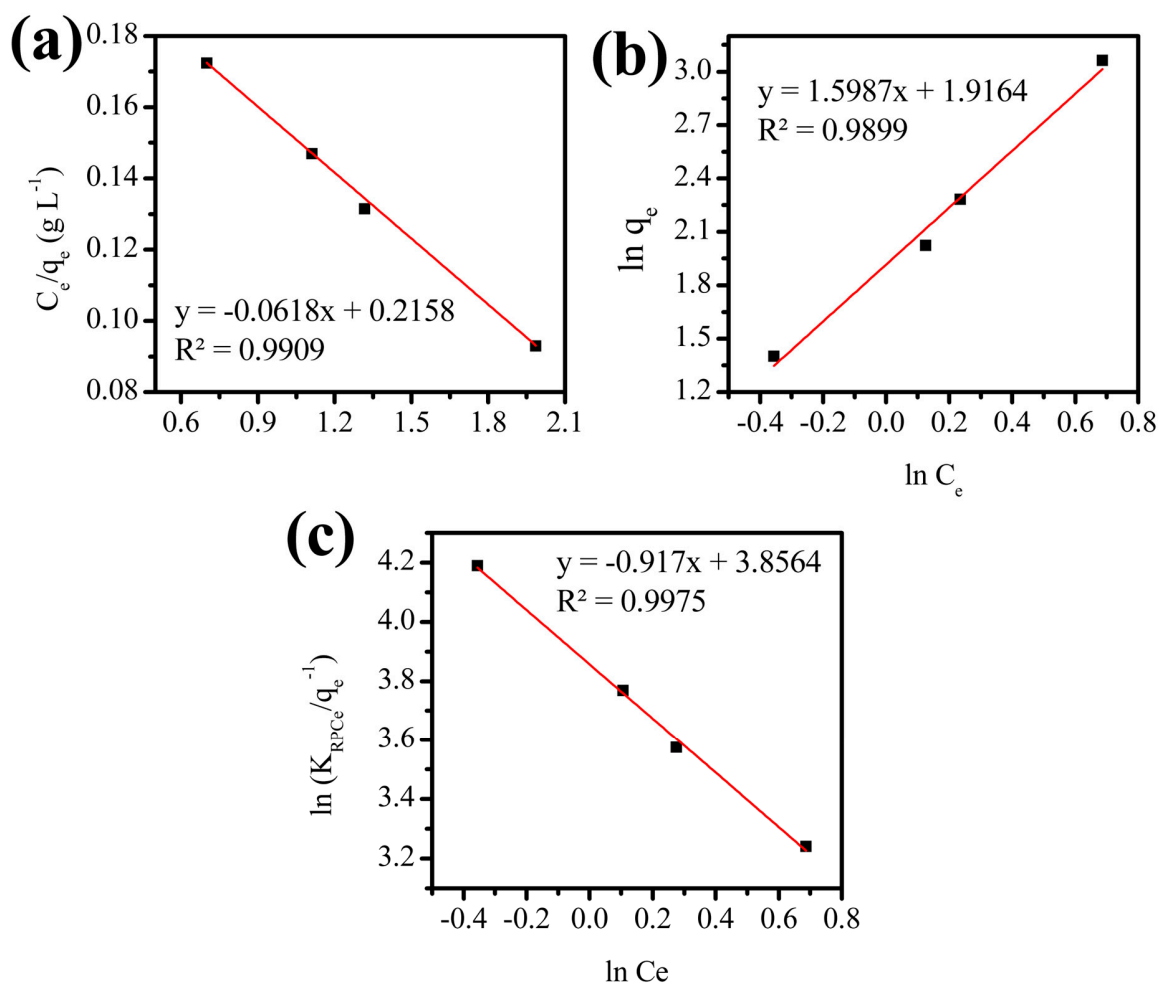

**Figure S9.** Adsorption isotherms for CR removal in distilled water using MMT as an adsorbent. (a) Langmuir model; (b) Freundlich model; (c) Redlich-Peterson model. Conditions: dye concentration  $1.23 \times 10^{-2}$  mmol L<sup>-1</sup> (8.57 mg L<sup>-1</sup>), adsorbent dose 0.2 - 2 g L<sup>-1</sup>, particle size <200  $\mu$ m, pH: 6.5, temperature 25°C, stirring rate 200 rpm, time 60 min.

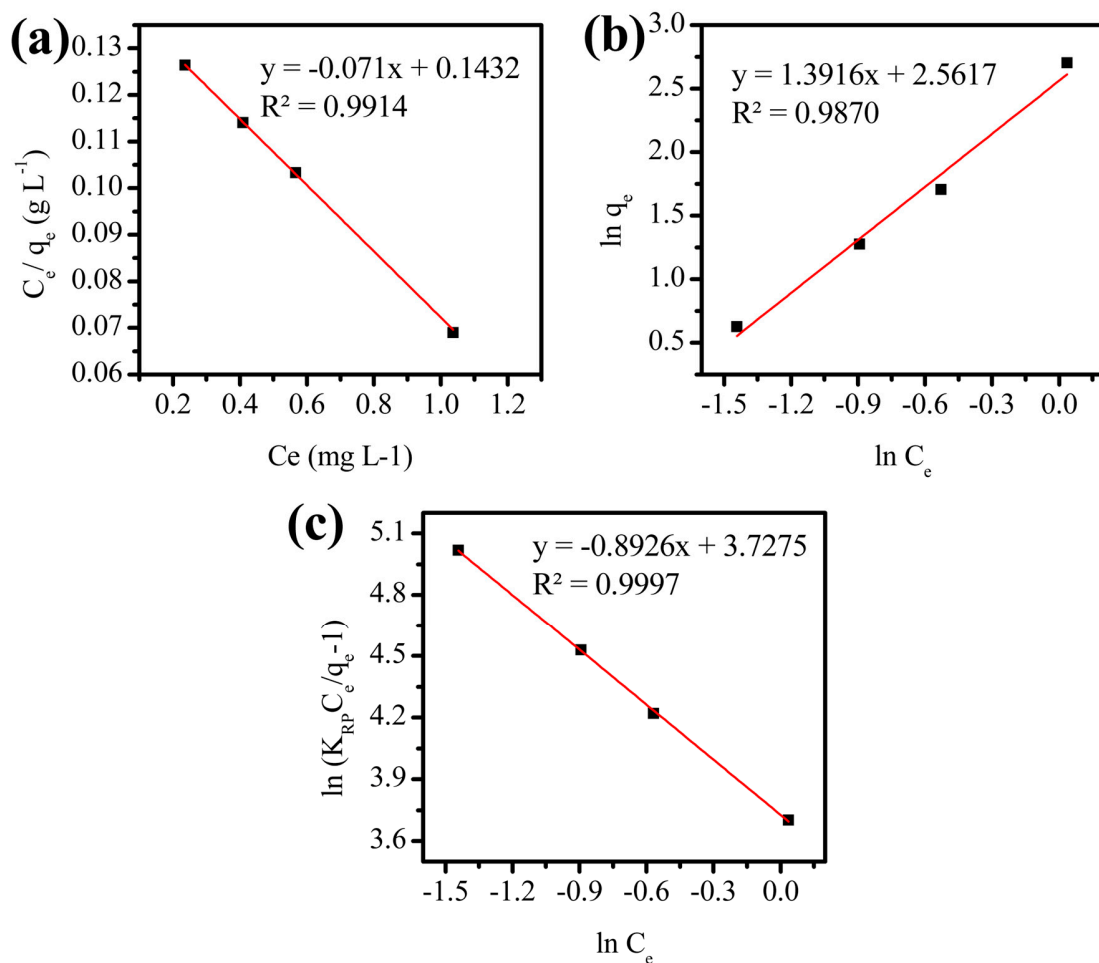

**Figure S10.** Adsorption isotherms for MB removal in distilled water using MMT as an adsorbent. (a) Langmuir model; (b) Freundlich model; (c) Redlich-Peterson model. Conditions: dye concentration  $1.23 \times 10^{-2}$  mmol L<sup>-1</sup> (3.93 mg L<sup>-1</sup>), adsorbent dose 0.2-2 g L<sup>-1</sup>, particle size <200  $\mu$ m, pH: 5.6, temperature 25°C, stirring rate 200 rpm, time 60 min.



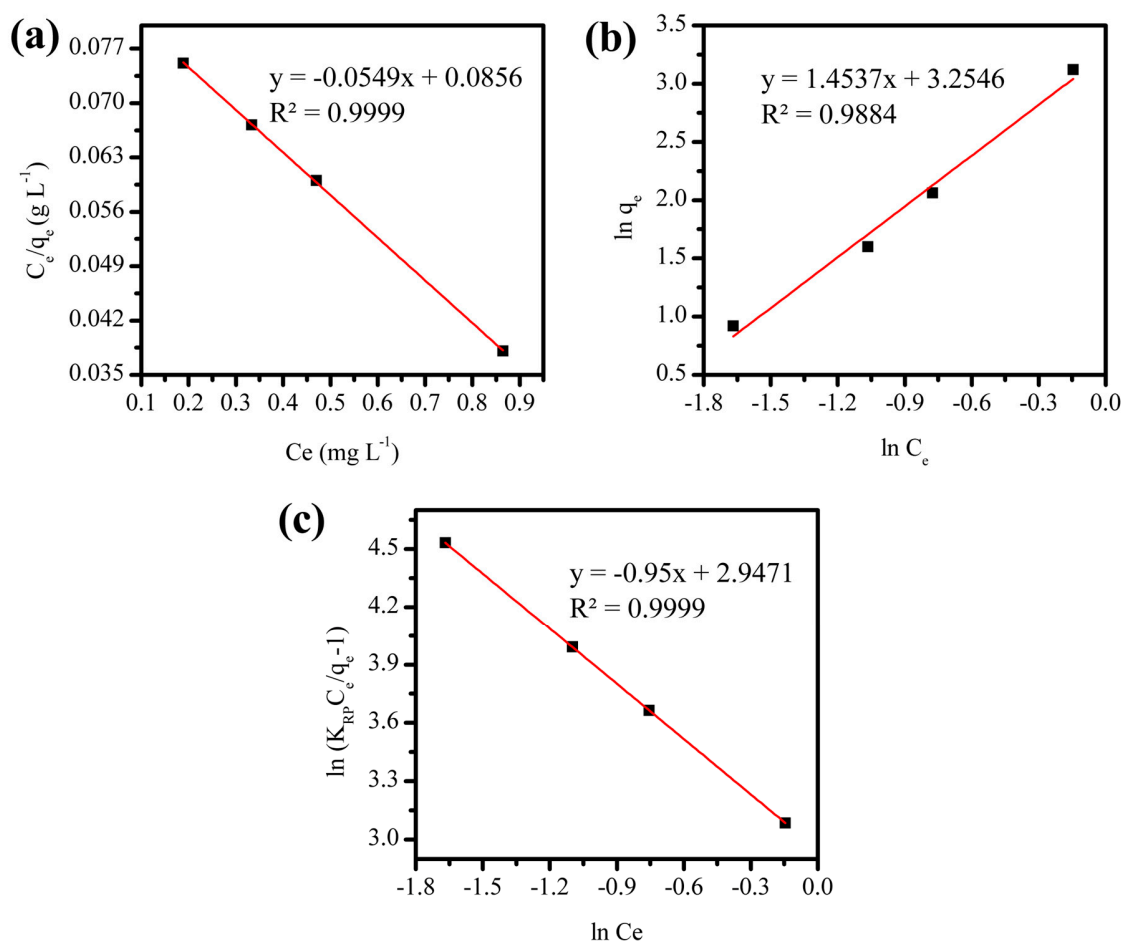

**Figure S11.** Adsorption isotherms for CV removal in distilled water using MMT as an adsorbent. (a) Langmuir model; (b) Freundlich model; (c) Redlich-Peterson model. Conditions: dye concentration  $1.23 \times 10^{-2}$  mmol L<sup>-1</sup> (4.85 mg L<sup>-1</sup>), adsorbent dose 0.2 - 2 g L<sup>-1</sup>, particle size <200  $\mu$ m, pH: 7.3, temperature 25°C, stirring rate 200 rpm, time 60 min.

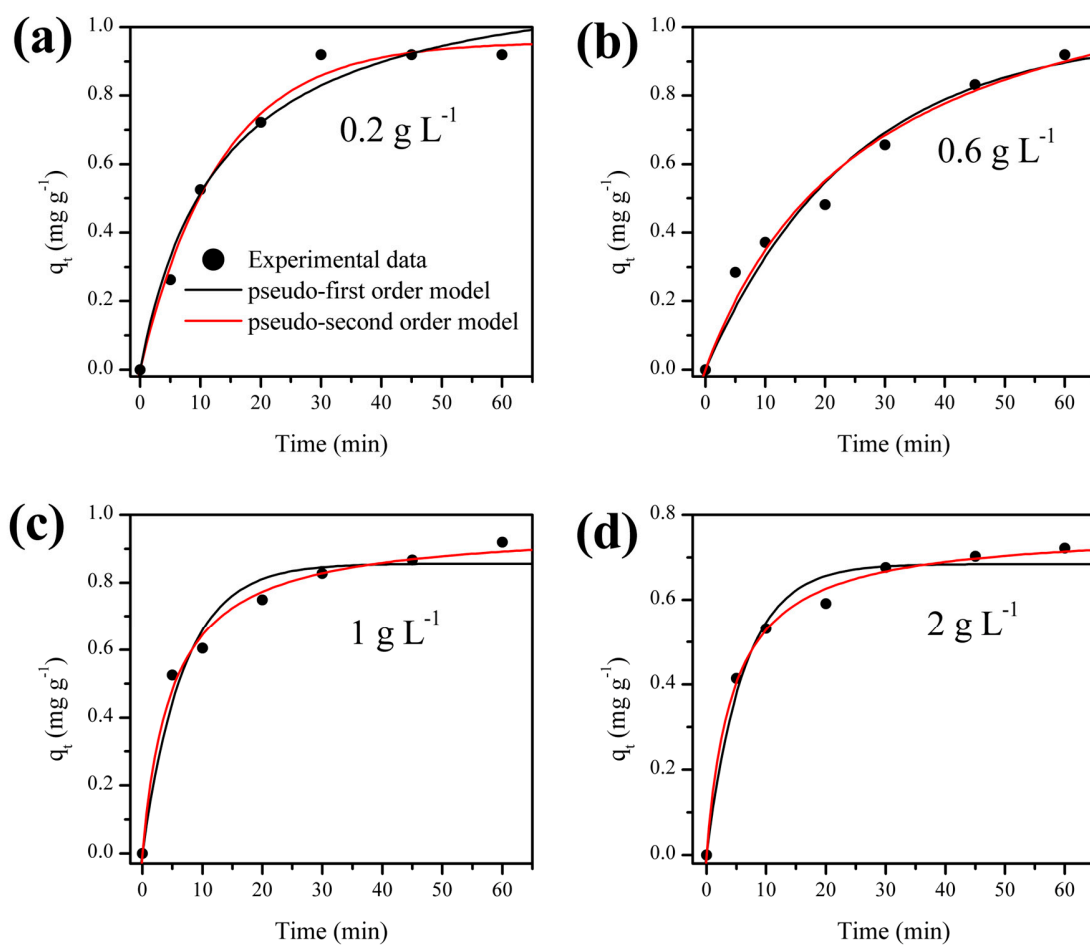

**Figure S12.** Kinetics of pseudo-first order model and pseudo-second order model for IC removal in distilled water using MMT as an adsorbent. (a) 0.2 g L<sup>-1</sup>; (b) 0.6 g L<sup>-1</sup>; (c) 1 g L<sup>-1</sup>; (d) 2 g L<sup>-1</sup>. Conditions: dye concentration  $1.23 \times 10^{-2}$  mmol L<sup>-1</sup> (5.74 mg L<sup>-1</sup>), particle size <200  $\mu$ m, pH: 5.7, temperature 25°C, stirring rate 200 rpm, time 60 min.

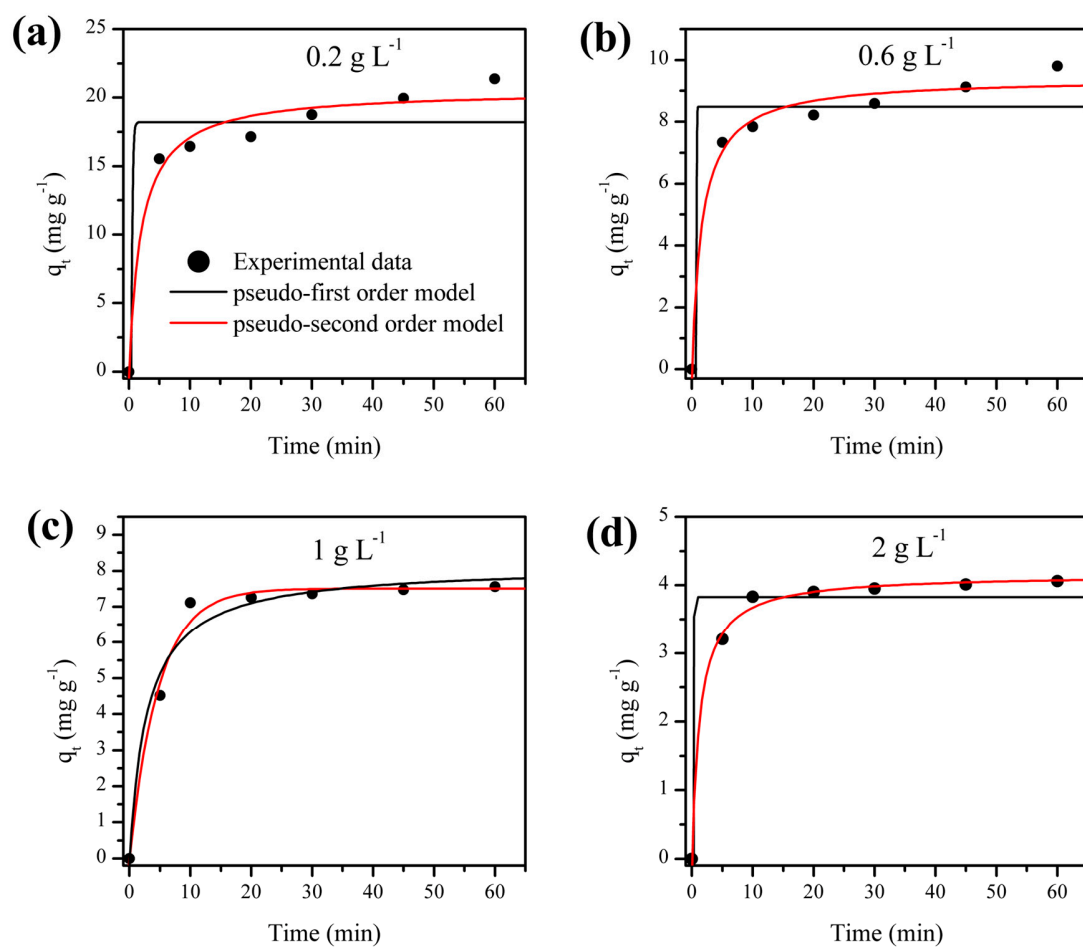

**Figure S13.** Kinetics of pseudo-first order model and pseudo-second order model for CR removal in distilled water using MMT as an adsorbent. (a) 0.2 g L<sup>-1</sup>; (b) 0.6 g L<sup>-1</sup>; (c) 1 g L<sup>-1</sup>; (d) 2 g L<sup>-1</sup>. Conditions: dye concentration  $1.23 \times 10^{-2}$  mmol L<sup>-1</sup> (8.57 mg L<sup>-1</sup>), particle size <200  $\mu$ m, pH: 6.5, temperature 25°C, stirring rate 200 rpm, time 60 min.

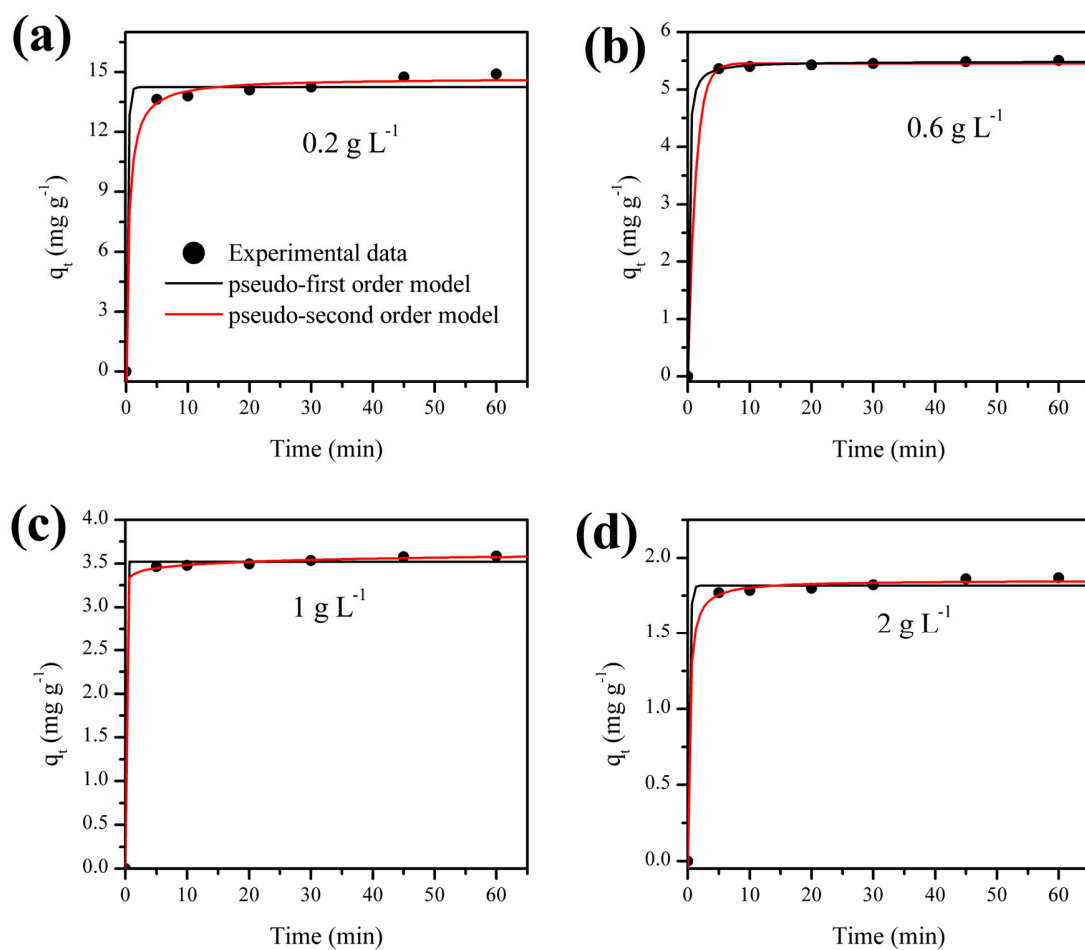

**Figure S14.** Kinetics of pseudo-first order model and pseudo second-order model for MB removal in distilled water using MMT as an adsorbent. (a) 0.2 g L<sup>-1</sup>; (b) 0.6 g L<sup>-1</sup>; (c) 1 g L<sup>-1</sup>; (d) 2 g L<sup>-1</sup>. Conditions: dye concentration  $1.23 \times 10^{-2}$  mmol L<sup>-1</sup> (3.93 mg L<sup>-1</sup>), particle size <200  $\mu$ m, pH: 5.6, temperature 25°C, stirring rate 200 rpm, time 60 min.

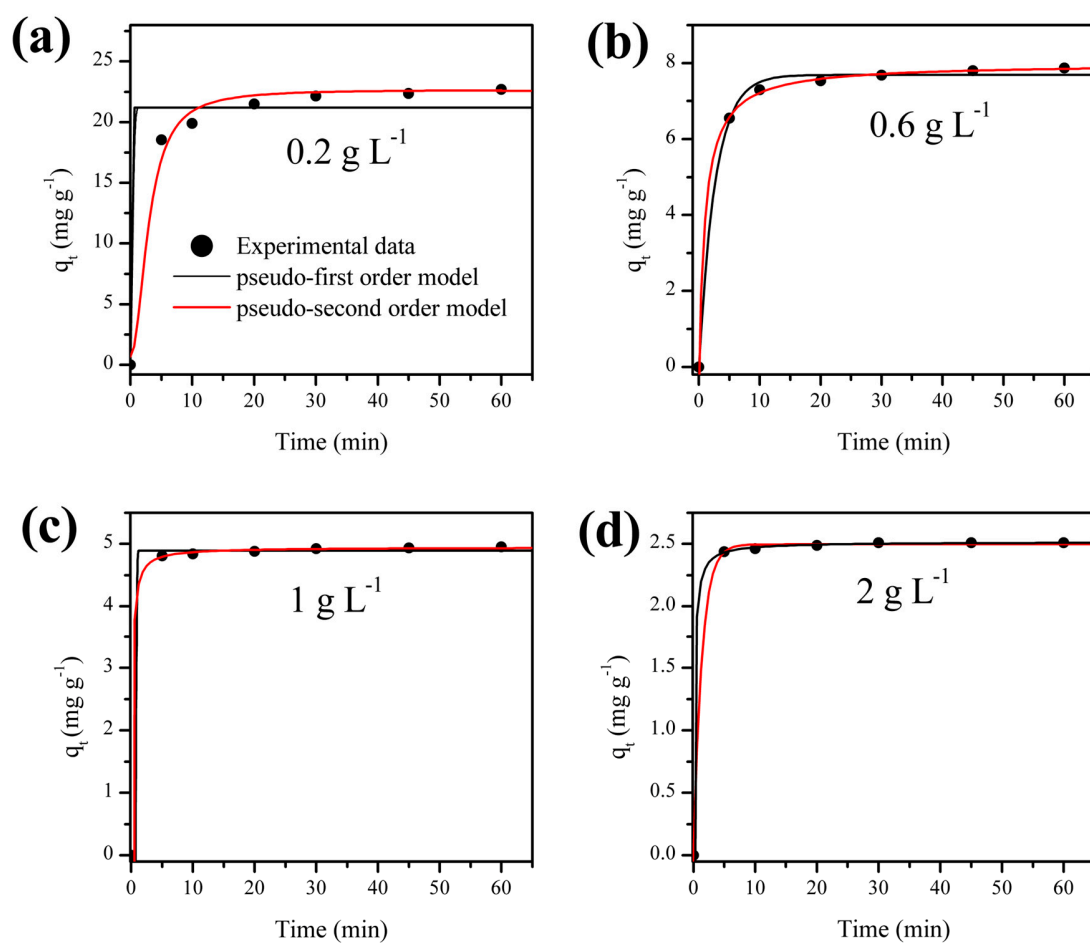

**Figure S15.** Kinetics of pseudo-first order model and pseudo-second order model for CV removal in distilled water using MMT as an adsorbent. (a) 0.2 g L<sup>-1</sup>; (b) 0.6 g L<sup>-1</sup>; (c) 1 g L<sup>-1</sup>; (d) 2 g L<sup>-1</sup>. Conditions: dye concentration  $1.23 \times 10^{-2}$  mmol L<sup>-1</sup> (4.85 mg L<sup>-1</sup>), particle size <200  $\mu$ m, pH: 7.3, temperature 25°C, stirring rate 200 rpm, time 60 min.
